# Supplementary material for: Diet Quality and Micronutrient Intake among Long-Term Weight Loss Maintainers
Source: PubMed Central journal article supplement (PMC6950482; doi:10.3390/nu11123046), 2019-12-13
Supplement: nutrients-11-03046-s001.pdf [file nutrients-11-03046-s001.pdf]

Supplementary Table S1: Healthy Eating Index-2015 Scoring.

| Adequacy Components           | Total Possible Points | Standard to Maximize Points      | Standard for score of zero      |
|-------------------------------|-----------------------|----------------------------------|---------------------------------|
| Total Fruits                  | 5                     | ≥0.8 cup equivalents/1,000 kcal  | No fruit                        |
| Whole Fruits                  | 5                     | ≥0.4 cup equivalents/1,000 kcal  | No whole fruit                  |
| Total Vegetables              | 5                     | ≥1.1 cup equivalents/1,000 kcal  | No vegetables                   |
| Greens and Beans              | 5                     | ≥0.2 cup equivalents/1,000 kcal  | No dark green veg/beans/peas    |
| Whole Grains                  | 10                    | ≥1.5 oz. equivalents/1,000 kcal  | No whole grains                 |
| Dairy                         | 10                    | ≥1.3 cup equivalents/1,000 kcal  | No dairy                        |
| Total Protein Foods           | 5                     | ≥2.5 oz. equivalents/1,000 kcal  | No protein foods                |
| Seafood & Plant Protein       | 5                     | ≥0.8 oz. equivalents/1,000 kcal  | No seafood/plant proteins       |
| Fatty Acids                   | 10                    | (PUFA+MUFA)/SFA ≥ 2.5            | (PUFA+MUFA)/SFA ≤ 1.2           |
| <b>Moderation Components</b>  |                       |                                  |                                 |
| Refined Grains                | 10                    | ≤ 1.8 oz. equivalents/1,000 kcal | ≥4.3 oz. equivalents/1,000 kcal |
| Sodium                        | 10                    | ≤ 1.1 g/1,000 kcal               | ≥ 2.0 g/1,000 kcal              |
| Added Sugars                  | 10                    | ≤ 6.5% energy                    | ≥ 26% of energy                 |
| Saturated Fats                | 10                    | ≤ 8% energy                      | ≥ 16% of energy                 |
| <b>Maximum Possible Score</b> | 100                   |                                  |                                 |

Source: Reedy et al., (2018)<sup>31</sup>; PUFA: polyunsaturated fatty acids; MUFA: monounsaturated fatty acids; SFA: saturated fatty acids.

**Supplementary Table S2: Reference Intakes: Estimated Average Requirement from the Food and Nutrition Board, National Academies of Sciences, Engineering and Medicine.**

|                   |                     | Males   |        | Females |           |
|-------------------|---------------------|---------|--------|---------|-----------|
|                   |                     | 19–50 y | > 51 y | 19–50 y | >51 years |
| <b>Vit A</b>      | (µg/d) <sup>a</sup> | 625     | 625    | 500     | 500       |
| <b>Vit C</b>      | (mg/d)              | 75      | 75     | 60      | 60        |
| <b>Vit D</b>      | (µg/d) <sup>b</sup> | 10      | 10     | 10      | 10        |
| <b>Vit E</b>      | (mg/d) <sup>c</sup> | 12      | 12     | 12      | 12        |
| <b>Thiamin</b>    | (mg/d)              | 1       | 1      | 0.9     | 0.9       |
| <b>Riboflavin</b> | (mg/d)              | 1.1     | 1.1    | 0.9     | 0.9       |
| <b>Niacin</b>     | (mg/d) <sup>d</sup> | 12      | 12     | 11      | 11        |
| <b>Vit B6</b>     | (mg/d)              | 1.1     | 1.4    | 1.1     | 1.3       |
| <b>Folate</b>     | (µg/d) <sup>e</sup> | 320     | 320    | 320     | 320       |
| <b>Vit B12</b>    | (µg/d)              | 2       | 2      | 2       | 2         |

Source: <https://www.ncbi.nlm.nih.gov/books/NBK56068/table/summarytables.t1/?report=objectonly>; The data in this table was taken from the DRI reports (available at [www.nap.edu](http://www.nap.edu)). An Estimated Average Requirement (EAR) is the average daily nutrient intake level estimated to meet the requirements of half of the healthy individuals in a group. EARs have not been established for Vitamin K, pantothenic acid, biotin, choline, chromium, fluoride, manganese, potassium, sodium, or chloride. SOURCES: DRI for Calcium, Phosphorous, Magnesium, Vitamin D, and Fluoride (1997); DRIs for Thiamin, Riboflavin, Niacin, Vitamin B6, Folate, Vitamin B12, Pantothenic Acid, Biotin, and Choline (1998); DRIs for Vitamin C, Vitamin E, Selenium, and Carotenoids (2000); DRIs for Vitamin A, Vitamin K, Arsenic, Boron, Chromium, Copper, Iodine, Iron, Manganese, Molybdenum, Nickel, Silicon, Vanadium, and Zinc (2001); DRIs for Energy, Carbohydrate, Fiber, Fat, Fatty Acids, Cholesterol, Protein, and Amino Acids (2002/2005); and Water, Potassium, Sodium, Chloride, and Sulfate (2005); and DRIs for Calcium and Vitamin D (2011). These reports may be accessed via [www.nap.edu](http://www.nap.edu). <sup>a</sup> As retinol activity equivalents (RAEs). 1 RAE = 1 µg retinol, 12 µg β-carotene, 24 µg α-carotene, or 24 µg β-cryptoxanthin. The RAE for dietary provitamin A carotenoids is two-fold greater than retinol equivalents (REs), whereas the RAE for preformed vitamin A is the same as RE. <sup>b</sup> As cholecalciferol. 1 µg cholecalciferol = 40 IU vitamin D. Assumes minimal sun exposure. <sup>c</sup> As α-tocopherol. α-tocopherol includes RRR-α-tocopherol, the only form of α-tocopherol that occurs naturally in foods, and the 2R-stereoisomeric forms of α-tocopherol (RRR-, RSR-, RRS-, and RSS-α-tocopherol) that occur in fortified foods and supplements. It does not include the 2S-stereoisomeric forms of α-tocopherol (SRR-, SSR-, SRS-, and SSS-α-tocopherol), also found in fortified foods and supplements. <sup>d</sup> As niacin equivalents (NE). 1 mg of niacin = 60 mg of tryptophan. <sup>e</sup> As dietary folate equivalents (DFE). 1 DFE = 1 µg food folate = 0.6 µg of folic acid from fortified food or as a supplement consumed with food = 0.5 µg of a supplement taken on an empty stomach.

Supplementary Table S3: Mineral Dietary Reference Intake: Estimated Average Requirement, Food and Nutrition Board, National Academies of Sciences, Engineering, and Medicine.

|                              |        | Males   |        | Females |         |      |
|------------------------------|--------|---------|--------|---------|---------|------|
|                              |        | 19–70 y | > 70 y | 19–30 y | 31–50 y | >50  |
| <b>Calcium</b>               | (mg/d) | 800     | 1000   | 800     | 800     | 1000 |
| <b>Copper</b>                | (µg/d) | 700     | 700    | 700     | 700     | 700  |
| <b>Iodine</b>                | (µg/d) | 95      | 95     | 95      | 95      | 95   |
| <b>Iron</b>                  | (mg/d) | 6       | 6      | 8.1     | 8.1     | 5    |
| <b>Magnesium</b>             | (mg/d) | 330     | 330    | 255     | 265     | 265  |
| <b>Phosphorus</b>            | (mg/d) | 580     | 580    | 580     | 580     | 580  |
| <b>Potassium<sup>a</sup></b> | (g/d)  | 4.7     | 4.7    | 4.7     | 4.7     | 4.7  |
| <b>Selenium</b>              | (µg/d) | 45      | 45     | 45      | 45      | 45   |
| <b>Zinc</b>                  | (mg/d) | 9.4     | 9.4    | 6.8     | 6.8     | 6.8  |

Source: <https://www.ncbi.nlm.nih.gov/books/NBK56068/table/summarytables.t1/?report=objectonly>; <sup>a</sup> Potassium has an AI rather than an EAR established. The data in this table was taken from the DRI reports (available at [www.nap.edu](http://www.nap.edu)). An EAR is the average daily nutrient intake level estimated to meet the requirements of half of the healthy individuals in a group. EARs have not been established for vitamin K, pantothenic acid, biotin choline, chromium, fluoride, manganese, potassium, sodium, or chloride. SOURCES: *DRI for Calcium, Phosphorous, Magnesium, Vitamin D, and Fluoride* (1997); *DRI for Thiamin, Riboflavin, Niacin, Vitamin B<sub>6</sub>, Folate, Vitamin B<sub>12</sub>, Pantothenic Acid, Biotin, and Choline* (1998); *DRI for Vitamin C, Vitamin E, Selenium, and Carotenoids* (2000); *DRI for Vitamin A, Vitamin K, Arsenic, Boron, Chromium, Copper, Iodine, Iron, Manganese, Molybdenum, Nickel, Silicon, Vanadium, and Zinc* (2001); *DRI for Energy, Carbohydrate, Fiber, Fat, Fatty Acids, Cholesterol, Protein, and Amino Acids (2002/2005)*; and *Water, Potassium, Sodium, Chloride, and Sulfate* (2005); and *DRI for Calcium and Vitamin D* (2011). These reports may be accessed via [www.nap.edu](http://www.nap.edu).
